# Supplementary material
Source: Copernicus journal article supplement (doi:10.5194/gmd-19-4725-2026)
Supplement: Supplementary file 1 [file gmd-19-4725-2026-supplement.pdf]

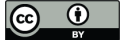

*Supplement of*

**Process-based evaluation of ENSO simulation sensitivity to horizontal resolution in the Chinese Academy of Sciences FGOALS-f3 Climate System Model**

**Meng-Er Song et al.**

*Correspondence to:* Lin Chen ([chenlin@nuist.edu.cn](mailto:chenlin@nuist.edu.cn))

The copyright of individual parts of the supplement might differ from the article licence.

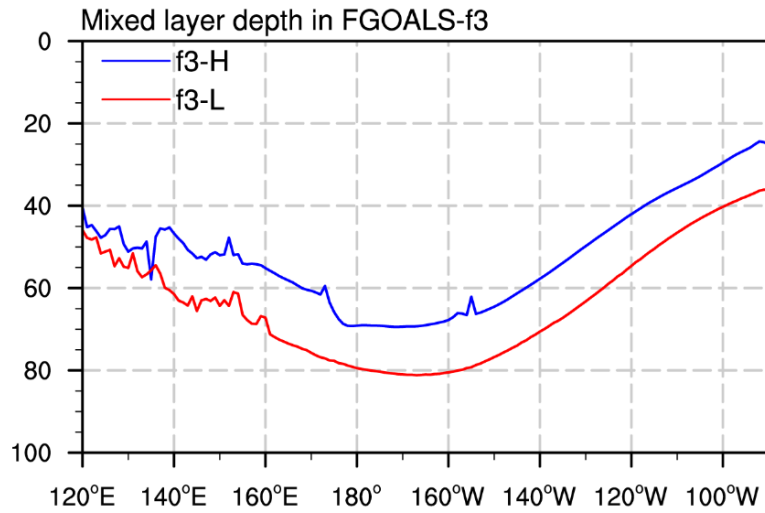

18  
 19 **Figure S1.** The longitudinally varying climatological mixed layer depth (unit: m) averaged over the  
 20 equatorial Pacific (5°S–5°N) in f3-L (red line) and f3-H (blue line).

21

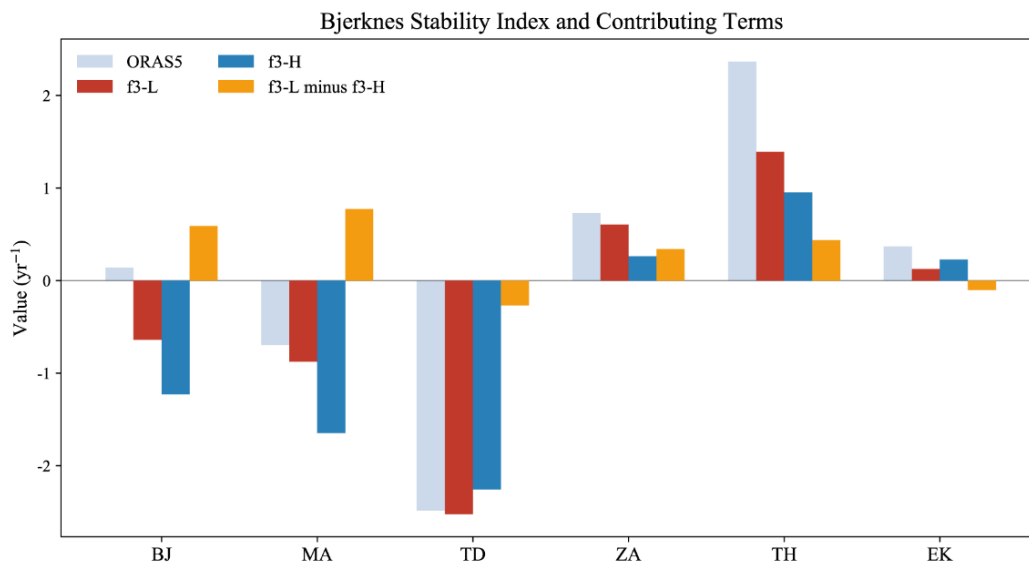

23 **Figure S2.** BJ index and the corresponding main contributing terms for the reanalysis (grey bars;  
 24 ORAS-5), f3-L (red bars), f3-H (blue bars) and their difference (f3-L minus f3-H, orange bars). The  
 25 BJ index is calculated using longitude-varying MLD (shown in Fig. S1). The five contributing terms  
 26 include dynamic damping by mean advection (MA), thermodynamic damping feedback (TD), zonal  
 27 advection feedback (ZA), thermocline feedback (TH) and Ekman feedback (EK).

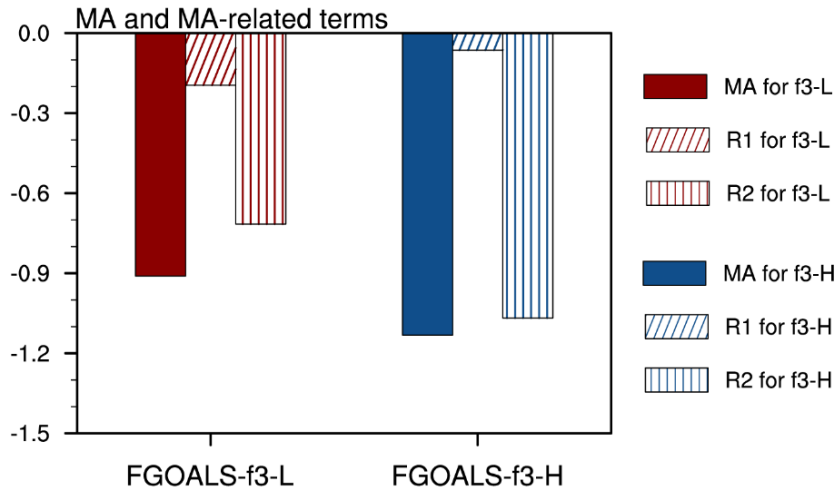

29 **Figure S3.** The MA term and its two components: dynamic damping by mean zonal current ( $R1 =$   
 30  $-a_1 \frac{\langle \Delta \bar{u} \rangle_E}{L_x}$ ) and dynamic damping by mean meridional current ( $R2 = -a_2 \frac{\langle \Delta \bar{v} \rangle_E}{L_y}$ ), for f3-L (red) and  
 31 f3-H (blue).  
 32

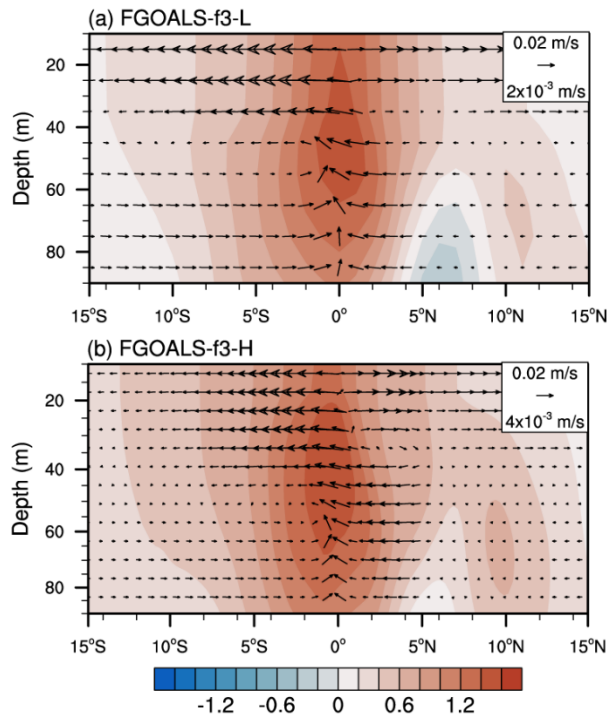

34 **Figure S4.** Oceanic mean currents (vectors, units:  $m s^{-1}$ ) and ENSO-related ocean temperature  
 35 anomalies (contours, units:  $^{\circ}C$ ) averaged over  $150^{\circ}W-90^{\circ}W$  for (a) f3-L and (b) f3-H. Here the  
 36 ENSO-related ocean temperature anomalies are obtained by regressing the ocean temperature  
 37 anomaly field onto the Niño3.4 index.

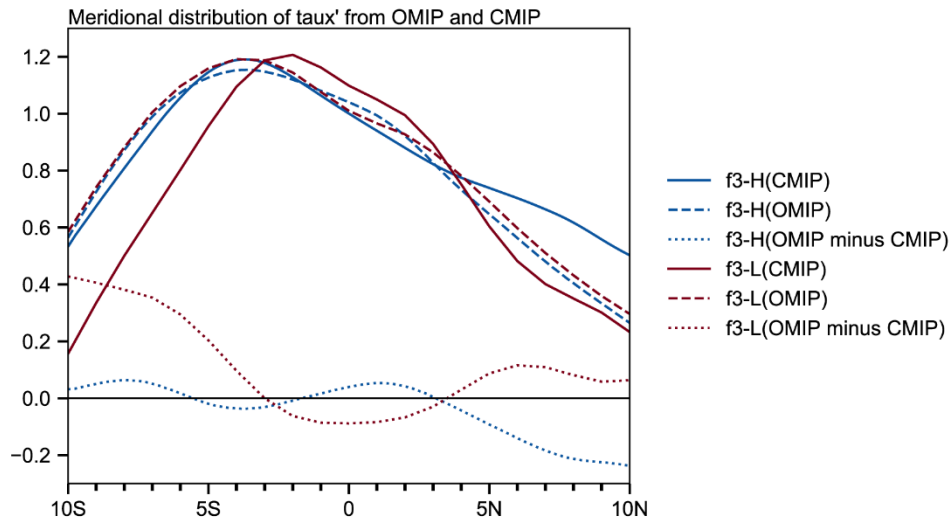

39 **Figure S5.** Meridional structure of normalized zonal wind stress anomalies [units:  $\text{N m}^{-2} (\text{N m}^{-2})^{-1}$ ]  
 40 averaged over  $160^{\circ}\text{E}$ – $150^{\circ}\text{W}$  for f3-L in CMIP (red solid line), f3-L in OMIP (red dashed line), and  
 41 their difference (red dotted line, OMIP minus CMIP); f3-H in CMIP (blue solid line), f3-H in OMIP  
 42 (blue dashed line), and their difference (blue dotted line, OMIP minus CMIP). The normalized zonal  
 43 wind stress anomalies are obtained by regressing the zonal wind stress anomaly field onto the Niño4  
 44 region ( $5^{\circ}\text{S}$ – $5^{\circ}\text{N}$ ,  $160^{\circ}\text{E}$ – $150^{\circ}\text{W}$ ) averaged zonal wind stress anomalies and then averaged over the  
 45 Niño4 longitude range ( $160^{\circ}\text{E}$ – $150^{\circ}\text{W}$ ).

46

47 **Section S1. Interpretation of the MA difference between f3-H and f3-L (results from the**  
48 **Longitude-varying MLD strategy)**

49

50 Under Strategy 2, the MA term exhibits a considerably larger difference between f3-L and f3-H than  
51 under Strategy 1. To understand this, we further decomposed the MA term into its two components:

52 the damping by mean zonal current ( $R1 = -a_1 \frac{\langle \Delta \bar{u} \rangle_E}{L_x}$ ) and the damping by mean meridional current

53 ( $R2 = -a_2 \frac{\langle \Delta \bar{v} \rangle_E}{L_y}$ ). As shown in Figure S3, the MA term difference primarily arises from the

54 meridional component (R2).

55 This meridional damping component is closely related to the mean subtropical cell (STC) circulation

56 in the central-eastern equatorial Pacific. Figure S4 shows the latitude–depth distribution of the mean

57 ocean currents and ENSO-related ocean temperature anomalies averaged over 150°W–90°W. The

58 ENSO-related temperature anomalies are centered at the equator from the surface down to

59 approximately 100 m, and are advected poleward by the mean meridional currents, constituting a

60 dynamical damping effect. In both models, the mean meridional flow associated with the STC is

61 directed poleward above approximately 40 m but equatorward below 40 m. Consequently, the

62 advection of temperature anomalies by the mean meridional current reverses sign at approximately

63 40 m, so that the contributions from the upper and lower portions partially cancel each other. When

64 a constant MLD of 65 m is used for vertical averaging, this cancellation occurs similarly in both

65 models, yielding comparable MA terms. However, under the longitude-varying MLD strategy, the

66 shallower MLD in f3-H means that the vertical averaging captures a thinner layer in which the

67 poleward (damping) branch dominates, resulting in a more negative MA term in f3-H compared to

68 f3-L. This MLD sensitivity of the MA term partially explains why the BJ index in f3-H becomes

69 even more negative under Strategy 2.

70
